# Supplementary material for: Synthesis and structural characterization of amido scorpionate rare earth metals complexes
Source: Royal Society of Chemistry journal article supplement (doi:10.1039/c4dt00770k), 2014-01-01
Supplement: c4dt00770k1.pdf [file c4dt00770k1.pdf]

---

---

**ELECTRONIC SUPPORTING INFORMATION**

---

---

**For**

**Synthesis and Structural Characterization of Amido Scorpionate Rare  
Earth Metals Complexes**

Isabel Márquez-Segovia, Agustín Lara-Sánchez,\* Antonio Otero,\* Juan Fernández-Baeza, Jose A.  
Castro-Osma, Luis. F. Sánchez-Barba and Ana M. Rodríguez

*Departamento de Química Inorgánica, Orgánica y Bioquímica, Facultad de Ciencias y Tecnologías  
Químicas, Universidad de Castilla-La Mancha, 13071-Ciudad Real, Spain*

E-mail: [Antonio.Otero@uclm.es](mailto:Antonio.Otero@uclm.es)

## Table of Contents

|                                                                                                                                                |    |
|------------------------------------------------------------------------------------------------------------------------------------------------|----|
| <b>Figure S1.</b> $^1\text{H}$ NMR spectra of reaction mixture of bpztcpH and $[\text{Y}\{\text{N}(\text{SiHMe}_2)_2\}_3(\text{thf})_2]$ ..... | S3 |
| <b>Table S1.</b> Crystal data and structure refinement details for <b>1</b> , <b>3</b> and <b>5</b> .....                                      | S4 |

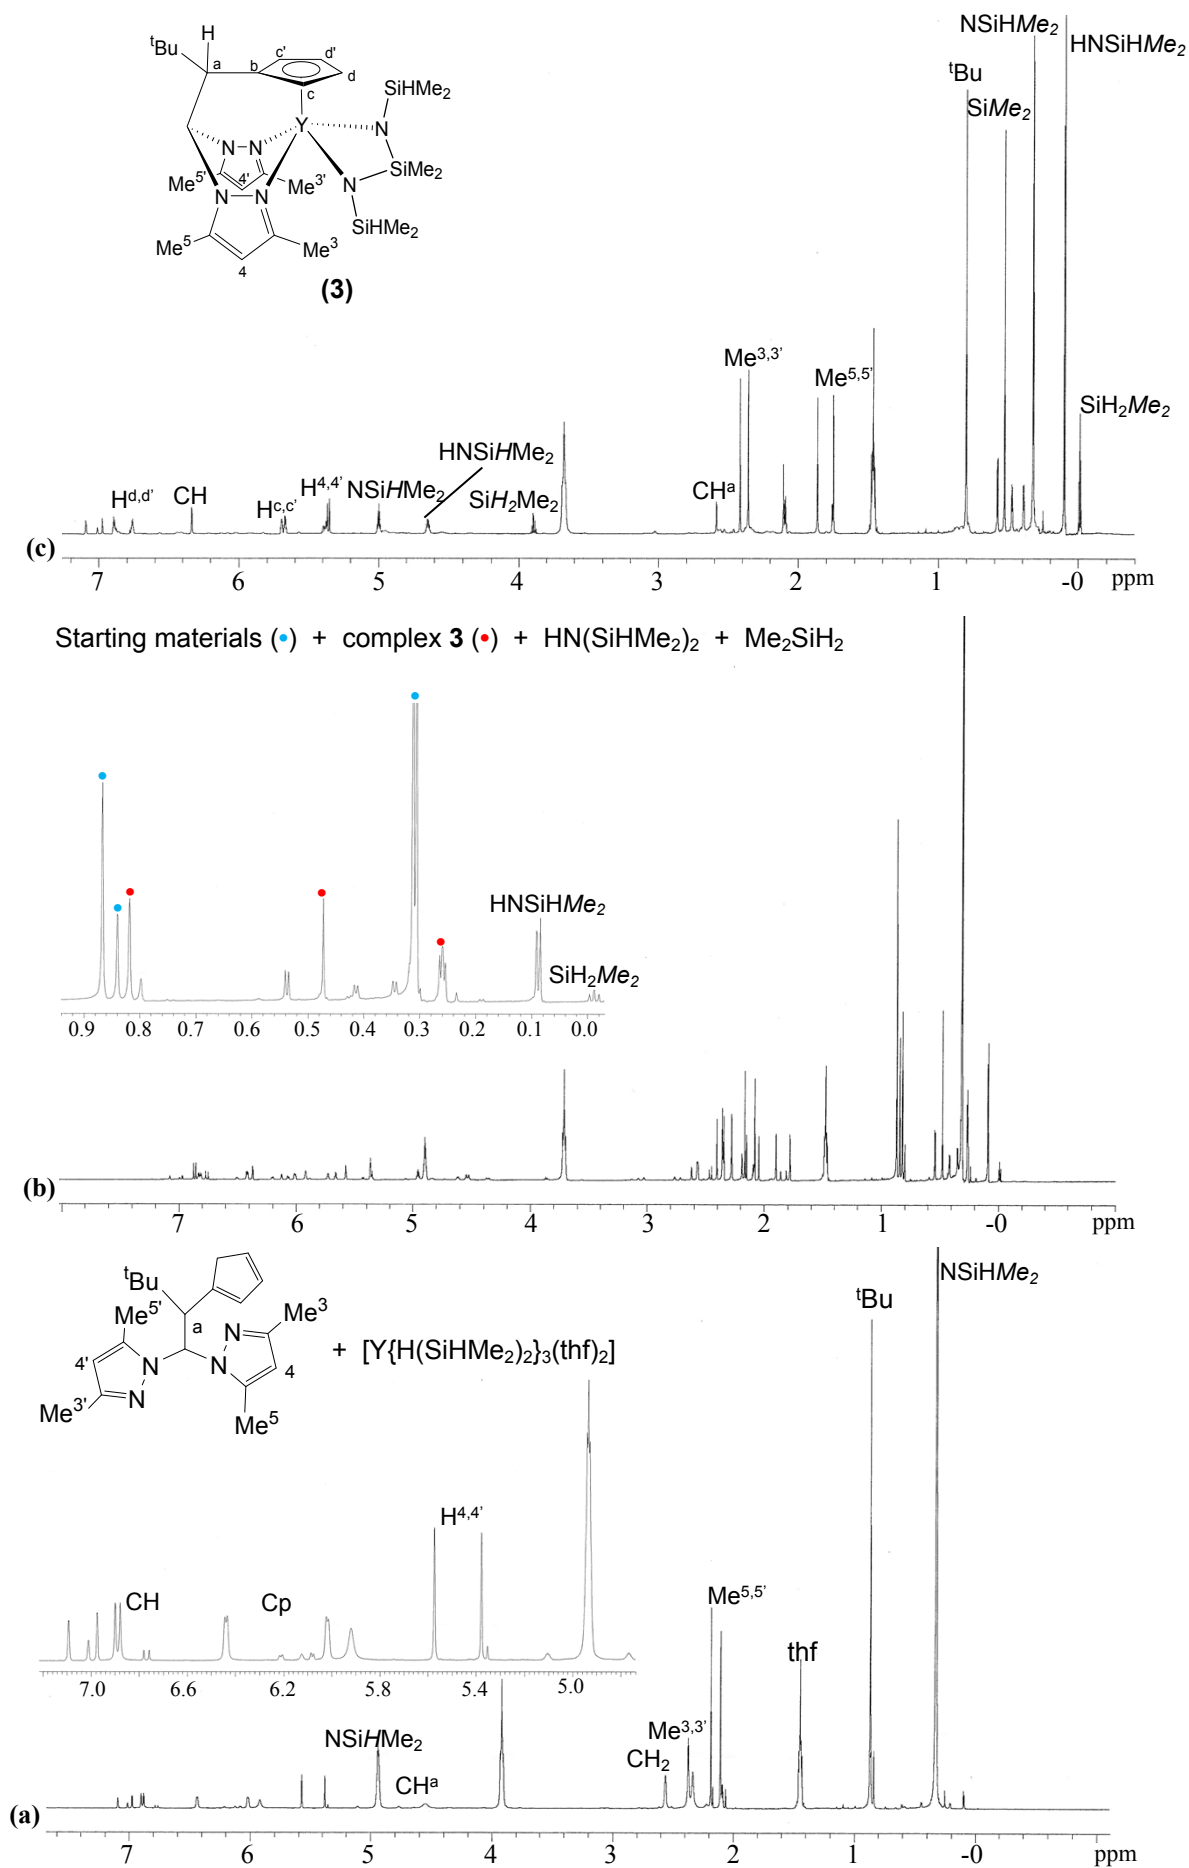

**Figure S1.** (a)  $^1\text{H}$  NMR spectrum of reaction mixture of bpztcPH and  $[\text{Y}\{\text{N}(\text{SiHMe}_2)_2\}_3(\text{thf})_2]$  in toluene- $d_8$  at 25 °C. (b)  $^1\text{H}$  NMR spectrum of reaction mixture after 3 h at 60 °C in toluene- $d_8$ . (c)  $^1\text{H}$  NMR spectrum of reaction mixture after 15 h at 60 °C in toluene- $d_8$ .

**Table S1.** Crystal data and structure refinement for **1**, **3·C<sub>7</sub>H<sub>8</sub>** and **5·C<sub>7</sub>H<sub>8</sub>**.

|                                                  | <b>1</b>                                                         | <b>3·C<sub>7</sub>H<sub>8</sub></b>                                | <b>5·C<sub>7</sub>H<sub>8</sub></b>                              |
|--------------------------------------------------|------------------------------------------------------------------|--------------------------------------------------------------------|------------------------------------------------------------------|
| Empirical formula                                | C <sub>35</sub> H <sub>49</sub> N <sub>6</sub> Si <sub>3</sub> Y | C <sub>30.5</sub> H <sub>53</sub> N <sub>6</sub> Si <sub>3</sub> Y | C <sub>44</sub> H <sub>65</sub> N <sub>6</sub> NdSi <sub>4</sub> |
| Formula weight                                   | 726.98                                                           | 676.97                                                             | 934.62                                                           |
| Temperature (K)                                  | 180(2)                                                           | 180(2)                                                             | 180(2)                                                           |
| Wavelength (Å)                                   | 0.71073                                                          | 0.71073                                                            | 0.71073                                                          |
| Crystal system                                   | Monoclinic                                                       | Monoclinic                                                         | Monoclinic                                                       |
| Space group                                      | P 2 <sub>1</sub> /n                                              | C 2/c                                                              | P 2 <sub>1</sub> /c                                              |
| a(Å)                                             | 13.609(7)                                                        | 24.434(2)                                                          | 17.107(7)                                                        |
| b(Å)                                             | 17.854(3)                                                        | 9.9080(7)                                                          | 17.353(3)                                                        |
| c(Å)                                             | 16.652(3)                                                        | 31.4640(10)                                                        | 16.089(6)                                                        |
| β(°)                                             | 108.76(2)                                                        | 105.003(4)                                                         | 98.231(13)                                                       |
| Volume(Å <sup>3</sup> )                          | 3831(2)                                                          | 7357.5(8)                                                          | 4727(3)                                                          |
| Z                                                | 4                                                                | 8                                                                  | 4                                                                |
| Density (calculated) (g/cm <sup>3</sup> )        | 1.260                                                            | 1.222                                                              | 1.313                                                            |
| Absorption coefficient (mm <sup>-1</sup> )       | 1.648                                                            | 1.711                                                              | 1.236                                                            |
| F(000)                                           | 1528                                                             | 2872                                                               | 1948                                                             |
| Crystal size mm <sup>3</sup>                     | 0.38 x 0.30 x 0.17                                               | 0.27 x 0.18 x 0.12                                                 | 0.52 x 0.44 x 0.11                                               |
| Index ranges                                     | -16≤h≤17<br>-22≤k≤20<br>-20≤l≤20                                 | -28≤h≤28<br>-11≤k≤11<br>-37≤l≤37                                   | -20≤h≤20<br>-20≤k≤16<br>-19≤l≤19                                 |
| Reflections collected                            | 26465                                                            | 35070                                                              | 28922                                                            |
| Independent reflections                          | 7822                                                             | 6293                                                               | 8104                                                             |
|                                                  | [R(int) = 0.1502]                                                | [R(int) = 0.0000] <sup>a</sup>                                     | [R(int) = 0.2220]                                                |
| Data / restraints / parameters                   | 7822 / 2 / 424                                                   | 6293 / 2 / 355                                                     | 8104 / 4 / 524                                                   |
| Goodness-of-fit on F <sup>2</sup>                | 0.863                                                            | 0.994                                                              | 0.843                                                            |
| Final R indices [ <i>I</i> > 2σ( <i>I</i> )]     | R1 = 0.0553<br>wR2 = 0.1053                                      | R1 = 0.0767<br>wR2 = 0.1523                                        | R1 = 0.0629<br>wR2 = 0.1109                                      |
| Largest diff. peak and hole (e.Å <sup>-3</sup> ) | 0.521 and -1.738                                                 | 0.671 and -0.619                                                   | 1.457 and -1.108                                                 |

<sup>a</sup> The value of R(int) = 0.000 was caused by the application of Squeeze.
